# Supplementary material
Source: PubMed Central journal article supplement (PMC7365683)

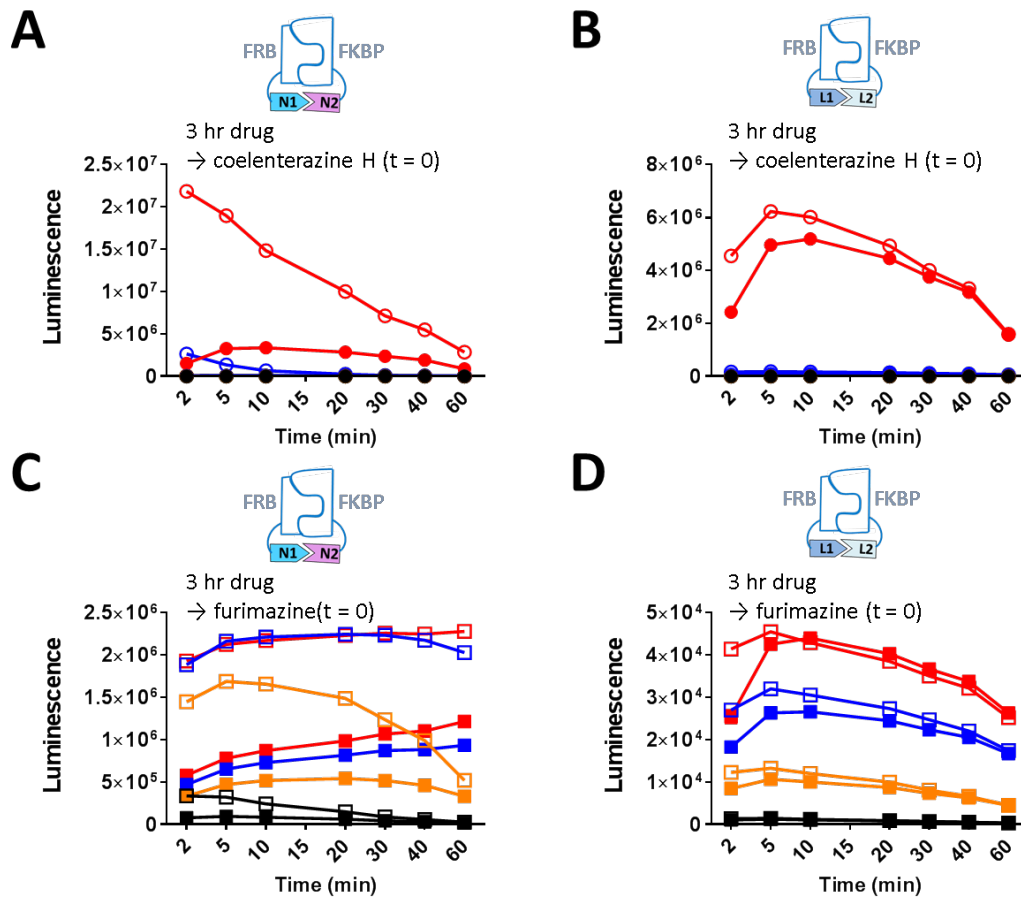

385

386 Supplementary Figure 1

387

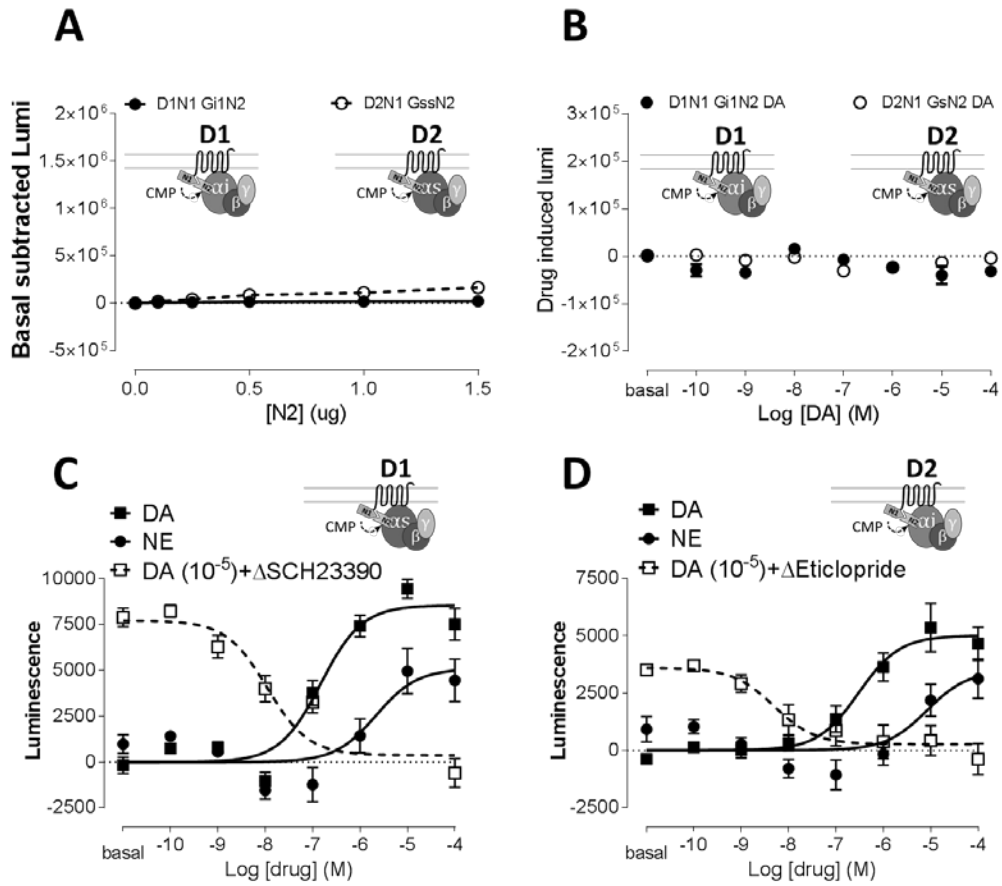

388

389 Supplementary Figure 2

Supplement: NIHMS1587986-supplement-1.pdf [file NIHMS1587986-supplement-1.pdf]
